# Supplementary material for: Characterization of Olive Fruit Damage Induced by Invasive Halyomorpha halys
Source: MDPI journal article supplement (doi:10.3390/insects14110848), 2023-10-31
Supplement: s1 [file s1]

Table S1. Phenolic composition (mg/g of fresh weight) of healthy and damaged olive fruits of cultivars Casaliva and Leccino (results are the mean of two independent extractions, each analyzed in duplicate). Means within a row followed by different letters are significantly different for  $P \leq 0.05$  according to linear model and multiple comparisons procedure.

| Cultivar | Compound                             | Healthy              | Damaged             | Highly damaged      |
|----------|--------------------------------------|----------------------|---------------------|---------------------|
| Casaliva | 3,4-DHPEA                            | $0.17 \pm 0.016$     | $0.17 \pm 0.023$    | $0.17 \pm 0.016$    |
|          | Idrossitirosolo glucoside (T.I.)     | n.d.                 | n.d.                | n.d.                |
|          | <i>p</i> -HPEA                       | $0.09 \pm 0.006$     | $0.1 \pm 0.026$     | $0.09 \pm 0.037$    |
|          | Demethyloleuropein                   | $0.47 \pm 0.206$     | $2.14 \pm 1.179$    | $3.45 \pm 0.127$    |
|          | Verbascoside                         | $0.35 \pm 0.109$ b   | $0.28 \pm 0.002$ b  | $4.1 \pm 0.534$ a   |
|          | 3,4-DHPEA-EDA                        | $0.73 \pm 0.04$      | $0.53 \pm 0.051$    | $0.65 \pm 0.005$    |
|          | Oleuropein                           | $12.57 \pm 0.012$ a  | $9.54 \pm 0.69$ b   | $8.13 \pm 0.414$ b  |
|          | <i>P</i> -HPEA-EDA                   | n.d.                 | n.d.                | n.d.                |
|          | Ligustroside                         | $0.26 \pm 0.077$     | $0.24 \pm 0.028$    | $0.32 \pm 0.019$    |
|          | Rutin                                | $0.2 \pm 0.092$      | $0.21 \pm 0.03$     | $0.32 \pm 0.001$    |
|          | (+)-1-Acetoxypinoresinol             | n.d.                 | n.d.                | n.d.                |
|          | (+)-Pinoresinol                      | n.d.                 | n.d.                | n.d.                |
|          | Ligustroside aglicone                | n.d.                 | n.d.                | n.d.                |
|          | Comselogoside (T.I.)                 | n.d.                 | n.d.                | n.d.                |
|          | <b>Sum of the phenolic fractions</b> | $14.84 \pm 0.534$ ab | $13.22 \pm 0.486$ b | $17.24 \pm 0.897$ a |
| Leccino  | 3,4-DHPEA                            | $0.23 \pm 0.003$     | $0.23 \pm 0.034$    | $0.22 \pm 0.033$    |
|          | Idrossitirosolo glucoside (T.I.)     | $0.22 \pm 0.003$     | $0.25 \pm 0.037$    | $0.28 \pm 0.041$    |
|          | <i>p</i> -HPEA                       | $0.14 \pm 0.002$     | $0.16 \pm 0.023$    | $0.14 \pm 0.022$    |
|          | Demethyloleuropein                   | $7.24 \pm 0.584$ ab  | $8.97 \pm 0.154$ a  | $5.27 \pm 0.144$ b  |
|          | Verbascoside                         | $0.35 \pm 0.004$     | $0.64 \pm 0.041$    | $0.81 \pm 0.012$    |
|          | 3,4-DHPEA-EDA                        | $0.64 \pm 0.008$ a   | $0.64 \pm 0.011$ a  | $0.58 \pm 0.01$ b   |
|          | Oleuropein                           | $9.12 \pm 0.184$     | $6.25 \pm 0.387$    | $8.96 \pm 0.906$    |
|          | <i>P</i> -HPEA-EDA                   | n.d.                 | n.d.                | n.d.                |
|          | Ligustroside                         | $0.43 \pm 0.005$ a   | $0.29 \pm 0.005$ c  | $0.33 \pm 0.006$ b  |
|          | Rutin                                | $0.43 \pm 0.005$ a   | $0.23 \pm 0.004$ c  | $0.37 \pm 0.006$ b  |
|          | (+)-1-Acetoxypinoresinol             | n.d.                 | n.d.                | n.d.                |
|          | (+)-Pinoresinol                      | n.d.                 | n.d.                | n.d.                |
|          | Ligustroside aglicone                | n.d.                 | n.d.                | n.d.                |
|          | Comselogoside (T.I.)                 | $0.08 \pm 0.001$ a   | $0.06 \pm 0.001$ b  | $0.04 \pm 0.005$ b  |
|          | <b>Sum of the phenolic fractions</b> | $18.67 \pm 0.371$ c  | $17.41 \pm 0.659$ b | $16.73 \pm 0.714$ a |
